# Supplementary material for: Nickel N-heterocyclic carbene–pyridine complexes that exhibit selectivity for electrocatalytic reduction of carbon dioxide over water
Source: Royal Society of Chemistry journal article supplement (doi:10.1039/c1cc10449g), 2011-01-01
Supplement: c1cc10449g.pdf [file c1cc10449g.pdf]

# Nickel *N*-Heterocyclic Carbene-Pyridine Complexes that Exhibit Selectivity for Electrocatalytic Reduction of Carbon Dioxide Over Water

V. Sara Thoi<sup>a,b</sup> and Christopher J. Chang<sup>a,b\*</sup>

<sup>a</sup>*Department of Chemistry and the Howard Hughes Medical Institute, University of California, Berkeley, University of California, Berkeley, CA 94720, USA;* <sup>b</sup>*Chemical Sciences Division, Lawrence Berkeley National Laboratory, Berkeley, CA 94720, USA*

**General Synthetic and Physical Methods.** Unless noted otherwise, all manipulations were carried out at room temperature under a dinitrogen atmosphere in a VAC glovebox or using high-vacuum Schlenk techniques. Diethyl ether, tetrahydrofuran, and pentane were dried over activated 4 Å molecular sieves, passed through a column of activated alumina, and sparged with nitrogen prior to use. Acetonitrile, acetonitrile-*d*<sub>3</sub>, propionitrile and butyronitrile were refluxed over CaH<sub>2</sub>, distilled, and sparged with nitrogen. All other reagents and solvents were purchased from commercial sources and used without further purification. Literature methods were used to synthesize Ni(DME)Cl<sub>2</sub><sup>1,2</sup> and 2-(imidazolyl)pyridine.<sup>3</sup> NMR spectra were recorded on Bruker spectrometers operating at 300, 400, or 500 MHz as noted. Chemical shifts are reported in ppm relative to residual protiated solvent; coupling constants are reported in Hz. Mass spectra were determined at the University of California, Berkeley Mass Spectrometry Facility.

**Cyclic Voltammetry.** Non-aqueous electrochemical experiments were conducted under a N<sub>2</sub> or CO<sub>2</sub> atmosphere in 0.1 M NBu<sub>4</sub>PF<sub>6</sub> in CH<sub>3</sub>CN. Cyclic voltammetry and controlled-potential electrolysis experiments were carried out using BASI's Epsilon potentiostat and C-3 cell stand.

The working electrode was a glassy carbon disk (3.0 mm diameter) and the counter electrode was a platinum wire. A silver wire in porous Vycor tip glass tube filled with 0.1 M NBu<sub>4</sub>PF<sub>6</sub> in CH<sub>3</sub>CN was used as a pseudo-reference electrode. The scan rate for all cyclic voltammograms was 100 mV/sec, unless otherwise noted. All potentials were referenced against ferrocene/ferrocenium as an external standard and converted to SCE by adding 0.40 V to the measured potentials.<sup>4</sup>

**Gas Chromatographic Analysis.** An Agilent 490-GC Micro-Gas Chromatograph with a Mol Sieve column and heated syringe injector was used for product detection. The column was heated to 80°C under Ar gas flow and the average sample volume of 200 nL was injected onto the column. Controlled-potential electrolysis was conducted using a custom-made glass cell fitted with a glassy carbon rod working electrode (5 mm diameter), Ag/AgNO<sub>3</sub> reference electrode, a Pt gauze auxiliary electrode in a glass frit, and a sparging needle. A glass adapter fused to Swagelok female miniature quick-connect with shut-off was also fitted to the cell and is used to attach to a male miniature quick-connect with shut-off on the injection line of the GC. Typically, a 10 mL solution of 0.3 M NBu<sub>4</sub>PF<sub>6</sub>/0.2 mM H<sub>2</sub>O in CH<sub>3</sub>CN was sparged for 10 minutes with N<sub>2</sub> or CO<sub>2</sub> and cyclic voltammograms were taken as controls. From a 3 mM solution of catalyst in 0.3 M NBu<sub>4</sub>PF<sub>6</sub> in CH<sub>3</sub>CN, 100 µL was injected into the cell and cyclic voltammograms were retaken under both N<sub>2</sub> and CO<sub>2</sub>. The solutions are then electrolyzed at the second reductive wave (−1.5 V, −1.6 V, −1.7 V for **6**, **7**, and **8**, respectively) for 2 h under CO<sub>2</sub> and subjected to GC analysis. For calculating turnover frequencies (TOF), a control in the absence of catalyst was run and the charge was subtracted from the overall charge passed in the catalysis.

**General Methods for X-Ray Crystallography.** Single-crystal X-Ray diffraction was conducted at University of California, Berkeley, College of Chemistry, X-Ray Crystallography Facility. Crystals were mounted on nylon loops in Paratone-N hydrocarbon oil. Air-sensitive samples were transferred from the glove box to Paratone-N and mounted quickly to avoid decomposition. All data collections were performed on either a Bruker SMART, or Bruker APEX diffractometer equipped with a CCD area detector and a low temperature apparatus. Data integration was performed using SAINT. Preliminary data analysis and absorption correction were performed using XPREP and SADABS.<sup>5</sup> Structure solution and refinement was performed using SHELX software package.<sup>6</sup>

**Bis(*N*-pyridylimidazoliumyl)ethane hexafluorophosphate ([H<sub>2</sub><sup>Et</sup>bimpy](PF<sub>6</sub>)<sub>2</sub>, **4**).** A solution of 2-(imidazolyl)pyridine (1.6 g, 11 mmol) in 5 mL of 1,2-dibromoethane was refluxed overnight. The solution was filtered by vacuum filtration and washed with CH<sub>2</sub>Cl<sub>2</sub> to remove excess 1,2-dibromoethane. A sticky brown tar was obtained as **1** and suspended in CH<sub>3</sub>CN. A second equivalent of 2-(imidazolyl)pyridine was added and refluxed overnight. The solution was again filtered and washed with CH<sub>2</sub>Cl<sub>2</sub> and the residue was dissolved in deionized H<sub>2</sub>O. NH<sub>4</sub>PF<sub>6</sub> (3.6 g, 0.011 mol) was added and the product was filtered by vacuum filtration as an off-white solid (2.6 g, 4 mmol, 38%). <sup>1</sup>H NMR (300 MHz, DMSO): δ 10.06 (2H, s), 8.63 (d, *J* = 4.5, 2H), 8.52 (2H, s), 8.21 (t, *J* = 8.1, 2H), 7.97 (d, *J* = 8.1, 2H), 7.866 (s, 2H), 7.63 (t, *J* = 5.1, 2H), 4.48 (s, 4H) <sup>13</sup>C NMR (125 MHz, DMSO): δ 149.70, 147.53, 141.13, 136.31, 125.84, 124.20, 119.81, 114.49, 49.52. Anal. Calcd for C<sub>18</sub>H<sub>18</sub>N<sub>6</sub>F<sub>12</sub>P<sub>2</sub>: C, 35.54; H, 2.98; N, 13.82. Found: C, 35.40; H, 2.85; N, 13.50. ESI-HRMS ([M]<sup>+</sup>) *m/z* calcd for C<sub>18</sub>H<sub>18</sub>N<sub>6</sub> 159.0791, found 159.0789.

**Bis(*N*-pyridylimidazoliumyl)propane hexafluorophosphate ([H<sup>Et</sup>bimpy](PF<sub>6</sub>)<sub>2</sub>, **5**).** The synthesis of **5** followed the procedure of **4**, starting with 468 mg (3.2 mmol) of imidazolylpyridine and 5 mL of dibromopropane (296 mg, 0.48 mmol, 15%). <sup>1</sup>H NMR (500 MHz, CD<sub>3</sub>CN) δ 9.38 (s, 1H), 8.64 (d, *J* = 4.0 Hz, 2H), 8.19 – 8.14 (m, 4H), 7.79 (d, *J* = 8.2 Hz, 2H), 7.67 (d, *J* = 1.9 Hz, 2H), 7.64 (dd, *J* = 7.3, 5.0 Hz, 2H), 4.41 (t, *J* = 7.3 Hz, 4H), 2.65 – 2.57 (q, *J* = 7.3 Hz, 2H). <sup>13</sup>C NMR (125 MHz, DMSO) ): δ 149.58, 146.34, 140.59, 134.27, 125.58, 123.57, 119.79, 114.10, 46.94, 29.53. Anal. Calcd for C<sub>18</sub>H<sub>18</sub>N<sub>6</sub>F<sub>12</sub>P<sub>2</sub>: C, 36.17; H, 3.24; N, 13.50. Found: C, 36.17; H, 2.89; N, 13.17.

**[Ni(<sup>Et</sup>bimpy)](PF<sub>6</sub>)<sub>2</sub> (**7**).** A solution of **4** (1.2 g, 1.9 mmol) and Ag<sub>2</sub>O (2.97 g, 12 mmol) in 5 mL of CH<sub>3</sub>CN was stirred overnight and the resulting solution was filtered by vacuum filtration to remove excess Ag<sub>2</sub>O. To the colorless filtrate, Ni(DME)Cl<sub>2</sub> (0.425 g, 1.9 mmol) was added and stirred overnight. The resulting solution was filtered by vacuum filtration and precipitated from Et<sub>2</sub>O. The precipitate was recrystallized in CH<sub>3</sub>CN/Et<sub>2</sub>O diffusion and yellow-green crystals were obtained (0.505 g, 77 mmol, 40%). <sup>1</sup>H NMR (500 MHz, CD<sub>3</sub>CN): δ 8.43 (d, *J* = 5.5, 2H), 8.34 (t, *J* = 7.5, 2H), 7.90 (d, *J* = 2.5, 2H), 7.85 (d, *J* = 8.5, 2H), 7.67 (t, *J* = 6.5, 2H), 7.39 (d, *J* = 2.5, 2H), 4.57 (s, 4H) <sup>13</sup>C NMR (100 MHz, CD<sub>3</sub>CN) ): δ 146.51, 150.51, 149.86, 143.85, 127.09, 124.50, 116.56, 112.23, 49.14 Anal. Calcd for C<sub>18</sub>H<sub>16</sub>N<sub>6</sub>NiP<sub>2</sub>F<sub>6</sub>: C, 32.51; H, 2.43; N, 12.64. Found: C, 32.05; H, 2.40; N, 12.81. ESI-HRMS ([M]<sup>+</sup>) *m/z* calcd for C<sub>18</sub>H<sub>16</sub>N<sub>6</sub>Ni 187.0389, found 187.0392.

**[Ni(<sup>Pr</sup>bimpy)](PF<sub>6</sub>)<sub>2</sub> (**8**).** The synthesis of **8** followed the procedure of **7**, starting with 180 mg (0.3 mmol) of **5** and 64 mg (0.3 mmol) of Ni(DME)Cl<sub>2</sub>. Structural characterization found that

$[\text{Ni}(\text{Prbimpy})\text{Cl}](\text{PF}_6)$  was formed and 103 mg (0.3 mmol) of  $\text{TiPF}_6$  was added to obtain **8** quantitatively. Single crystals were obtained by diffusing  $\text{Et}_2\text{O}$  into a concentrated solution of **8** in  $\text{CH}_3\text{CN}$ .  $^1\text{H}$  NMR (500 MHz,  $\text{CD}_3\text{CN}$ )  $\delta$  8.47 (d,  $J = 5.4$  Hz, 2H), 8.36 (t,  $J = 7.8$  Hz, 2H), 7.98 (d,  $J = 1.8$  Hz, 2H), 7.91 (d,  $J = 8.2$  Hz, 2H), 7.68 (t,  $J = 7.8$  Hz, 2H), 7.44 (d,  $J = 1.9$  Hz, 2H), 4.36 (s, br, 2H), 3.98 (s, br, 2H), 2.29 (s, br, 2H).  $^{13}\text{C}$  NMR (125 MHz, DMSO):  $\delta$  157.18, 150.37, 149.50, 143.26, 125.93, 124.40, 117.88, 112.25, 46.05, 29.64. Anal. Calcd for  $\text{C}_{18}\text{H}_{18}\text{N}_6\text{F}_{12}\text{P}_2$ : C, 33.61; H, 2.67; N, 12.38. Found: C, 33.33; H, 2.35; N, 12.03.

$[\text{Ni}_2(\text{Mebimpy})_2](\text{OTf})_2$  (**9**). A suspension of  $\text{KC}_8$  (21 mg, 0.15 mmol) in THF was added to a suspension of **6** (100 mg, 0.15 mmol) in THF slowly. The solution slowly turned dark and was stirred overnight. The solution was filtered to obtain a dark precipitate of the product and graphite. The precipitate was dissolved in  $\text{CH}_3\text{CN}$  and the graphite was filtered. The filtrate was evaporated and a black residue was obtained (24 mg, 0.069 mmol, 92%). Single crystals were obtained by diffusing  $\text{Et}_2\text{O}$  into a concentrated solution of **9** in  $\text{CH}_3\text{CN}$  at  $-30^\circ\text{C}$ .  $^1\text{H}$  NMR (500 MHz,  $\text{CD}_3\text{CN}$ )  $\delta$  7.84 (triplet,  $J = 7.5$  Hz, 2H), 7.67 (d,  $J = 2.1$  Hz, 2H), 7.59 (m, 4H), 7.54 (d,  $J = 2.1$  Hz, 2H), 7.13 (dd,  $J = 6.8$ , 2H), 6.41 (s, 2H).  $^{13}\text{C}$  NMR (125 MHz,  $\text{CD}_3\text{CN}$ ):  $\delta$  187.35, 148.53, 148.36, 138.38, 134.41, 123.76, 115.36, 110.69, 63.10. Anal. Calcd for  $\text{C}_{36}\text{H}_{28}\text{N}_{12}\text{F}_6\text{O}_6\text{S}_2 \text{Ni}_2$ : C, 42.53; H, 2.77; N, 16.48. Found: C, 33.33; H, 2.61; N, 16.55.

$[\text{Ni}_2(\text{Etbimpy})_2](\text{PF}_6)_2$  (**10**). The synthesis of **10** followed the procedure of **9**, starting with 7.8 (0.057 mmol) of  $\text{KC}_8$  and 37 mg of **7** (0.056 mmol) and obtaining a yield of 24 mg of **10** (0.023 mmol, 82%). Single crystals were obtained by diffusing  $\text{Et}_2\text{O}$  into a concentrated solution of **9** in  $\text{CH}_3\text{CN}$  at  $-30^\circ\text{C}$ .  $^1\text{H}$  NMR (500 MHz,  $\text{CD}_3\text{CN}$ ):  $\delta$  7.95, 7.84, 7.68, 7.62, 7.49, 7.7, 7.24, 7.12,

7.037, 6.27, 4.44, 4.23  $^{13}\text{C}$  NMR (125 MHz,  $\text{CD}_3\text{CN}$  ):  $\delta$  183.72, 148.81, 147.34, 138.02, 125.23, 122.54, 121.13, 110.61, 49.01, 14.57 ESI-HRMS ( $[\text{M}]^+$ )  $m/z$  calcd for  $\text{C}_{18}\text{H}_{16}\text{N}_6\text{Ni}$  374.0784, found 374.0776.

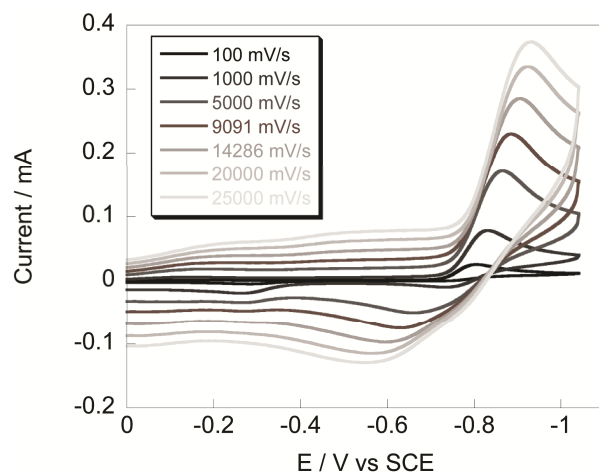

**Fig. S1** Cyclic voltammograms of **6** in the presence of  $\text{N}_2$  at different scan rates, in 0.1 M  $\text{NBu}_4\text{PF}_6$  in  $\text{CH}_3\text{CN}$ , using a glassy carbon disk electrode.

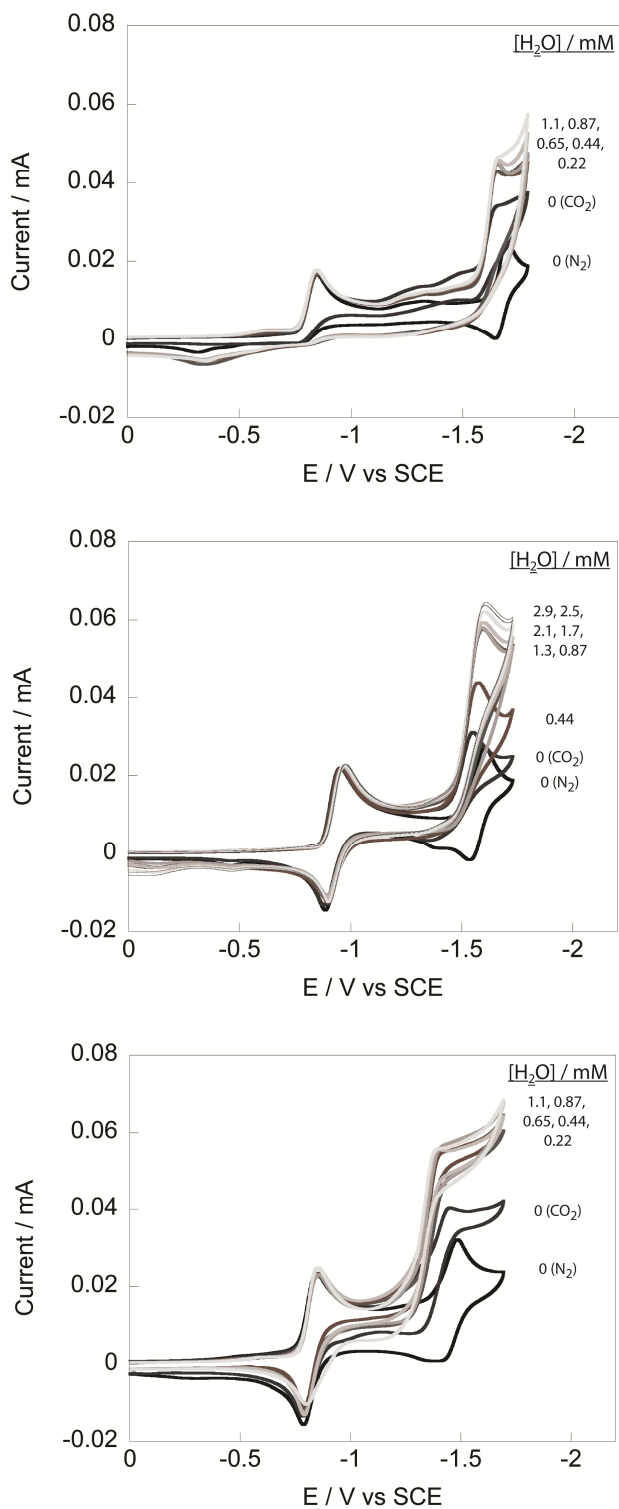

**Fig. S2** Cyclic voltammograms of **6** (top), **7** (middle), and **8** (bottom) in the presence of N<sub>2</sub>, CO<sub>2</sub>, and H<sub>2</sub>O under a CO<sub>2</sub> atmosphere in 0.1 M NBu<sub>4</sub>PF<sub>6</sub> in CH<sub>3</sub>CN. Scan rate: 100 mV/s; glassy carbon disk electrode.

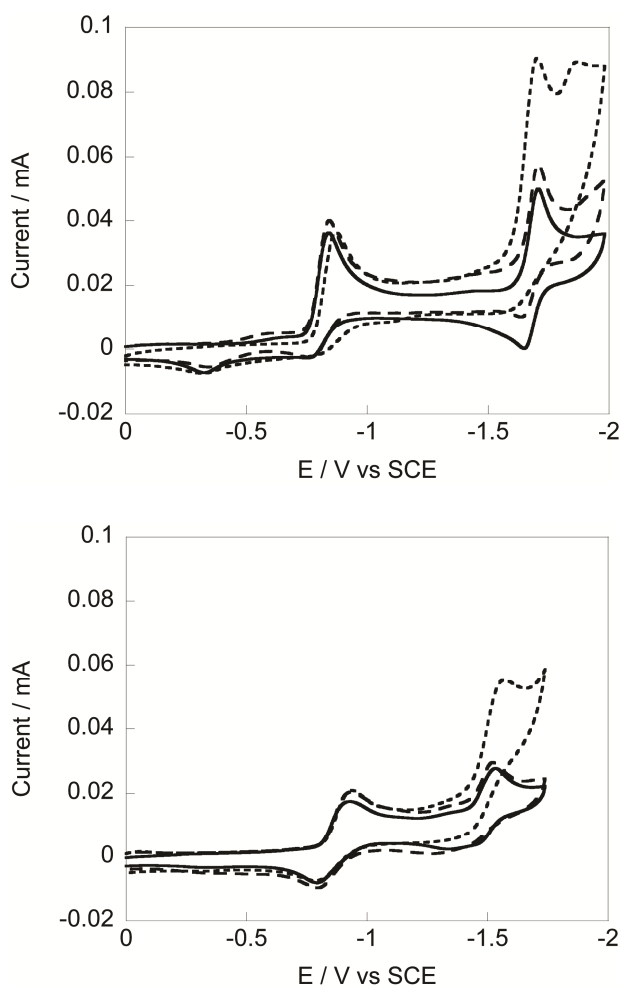

**Fig. S3** Cyclic voltammograms of **6** (top) and **7** (bottom) in the presence of N<sub>2</sub> (—), 0.87 mM H<sub>2</sub>O under a N<sub>2</sub> atmosphere (---), and subsequently, 0.87 mM H<sub>2</sub>O under a CO<sub>2</sub> atmosphere (···) in 0.1 M NBu<sub>4</sub>PF<sub>6</sub> in CH<sub>3</sub>CN. Scan rate: 100 mV/s; glassy carbon disk electrode.

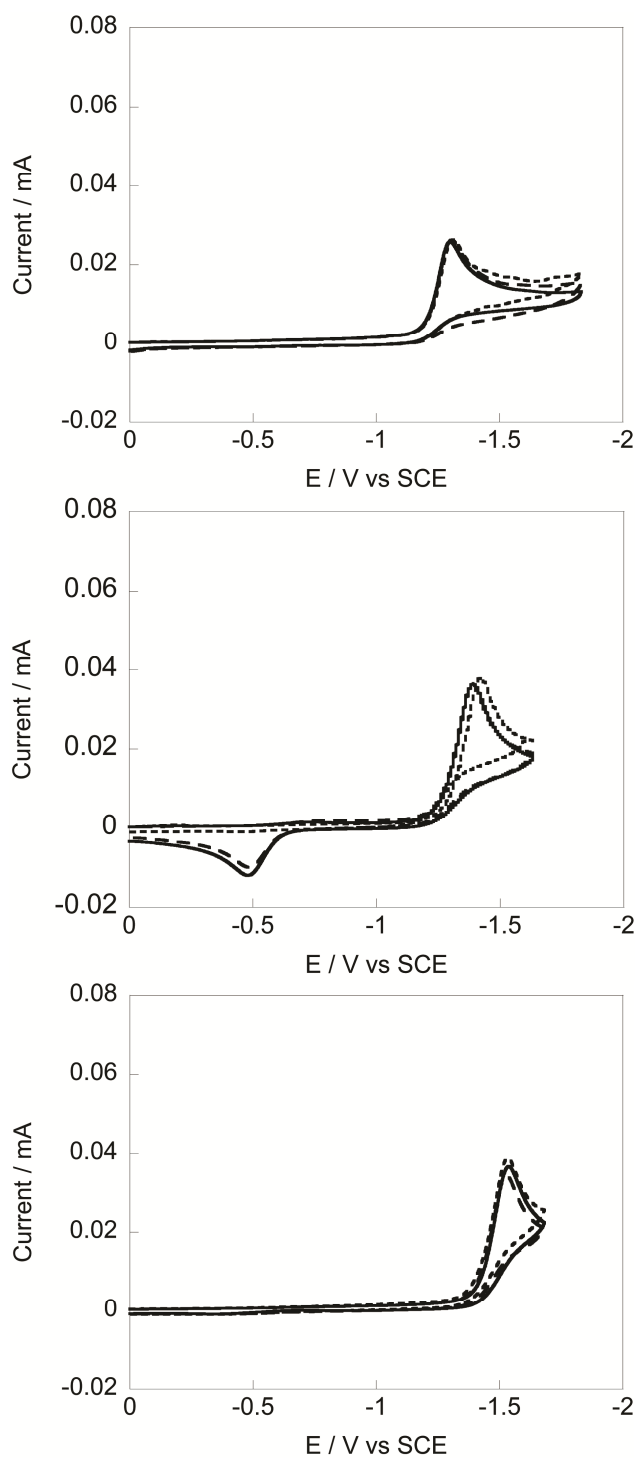

**Fig. S4** Cyclic voltammograms of **3** (top), **4** (middle), and **5** (bottom) in the presence of N<sub>2</sub> (—), CO<sub>2</sub> (---), and subsequently, 0.44 mM H<sub>2</sub>O under a CO<sub>2</sub> atmosphere (....) in 0.1 M NBu<sub>4</sub>PF<sub>6</sub> in CH<sub>3</sub>CN. Scan rate: 100 mV/s; glassy carbon disk electrode.

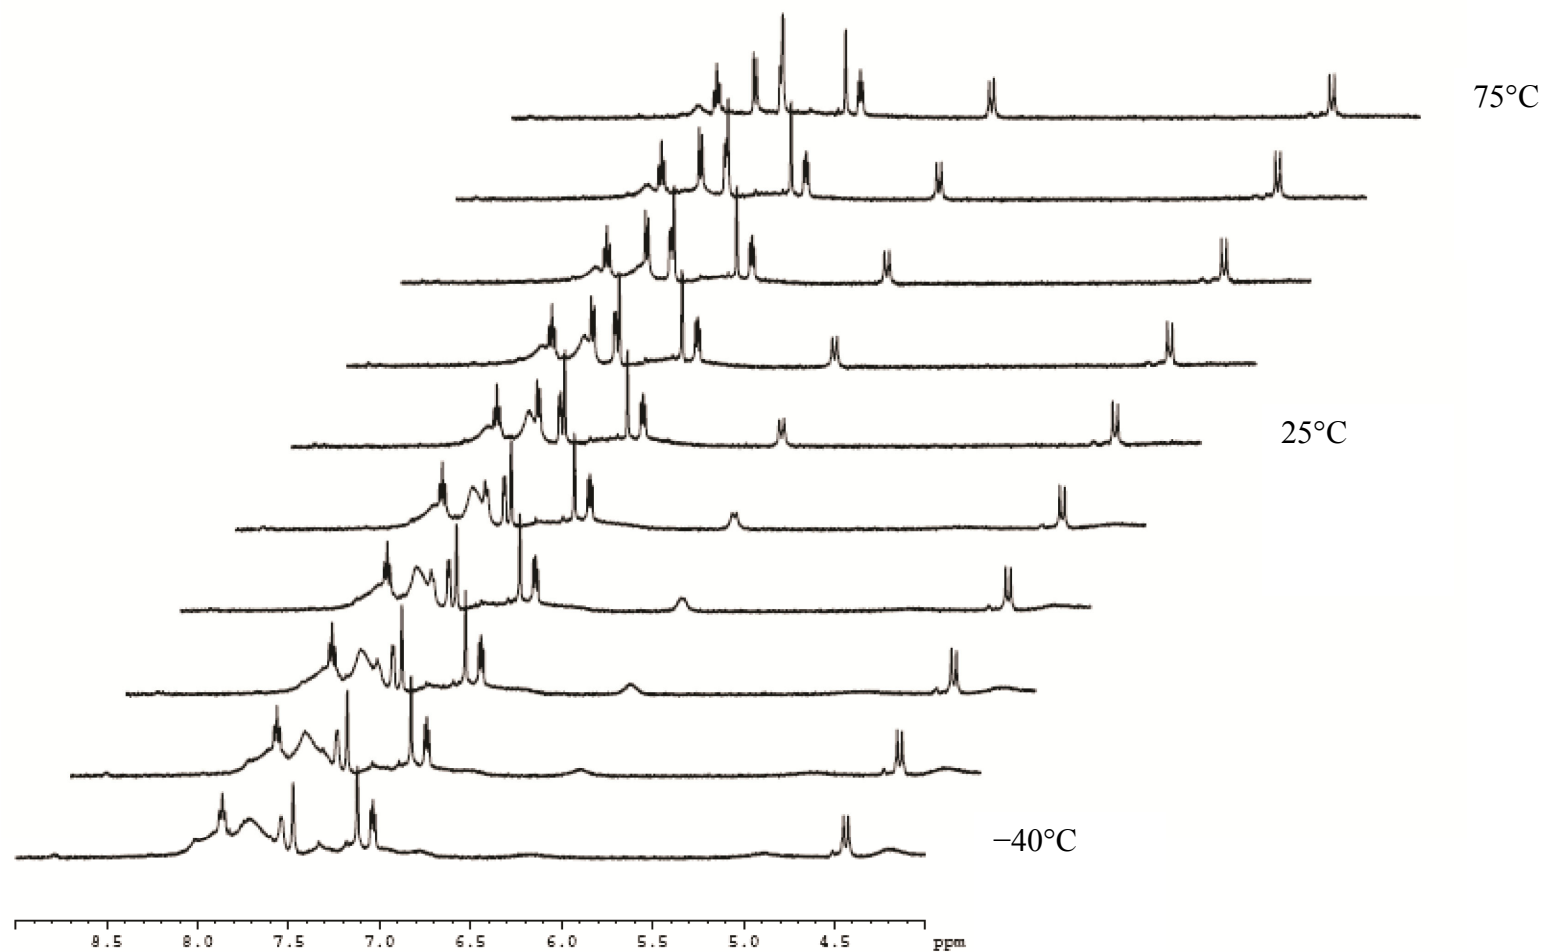

**Fig. S5** Variable-temperature  $^1\text{H}$  NMR of **10** from 75°C (top) to -40°C (bottom) in a gas-tight J. Young tube under a  $\text{N}_2$  atmosphere.  $\text{CD}_3\text{CN}$ ; 500 MHz.

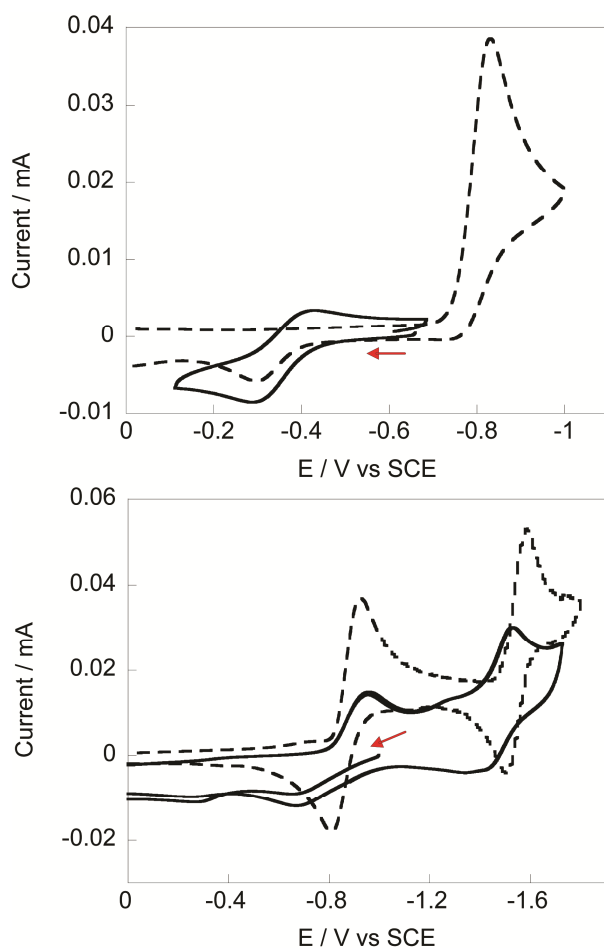

**Fig. S6** Cyclic voltammograms of **9** (top) and **10** (bottom) in the presence of N<sub>2</sub> (—), and their Ni(II) congeners, **6** and **7**, respectively (---) in 0.1 M NBu<sub>4</sub>PF<sub>6</sub> in CH<sub>3</sub>CN. The arrow refers to the direction of the potential scanned in **9** and **10**. Scan rate: 100 mV/s; glassy carbon disk electrode.

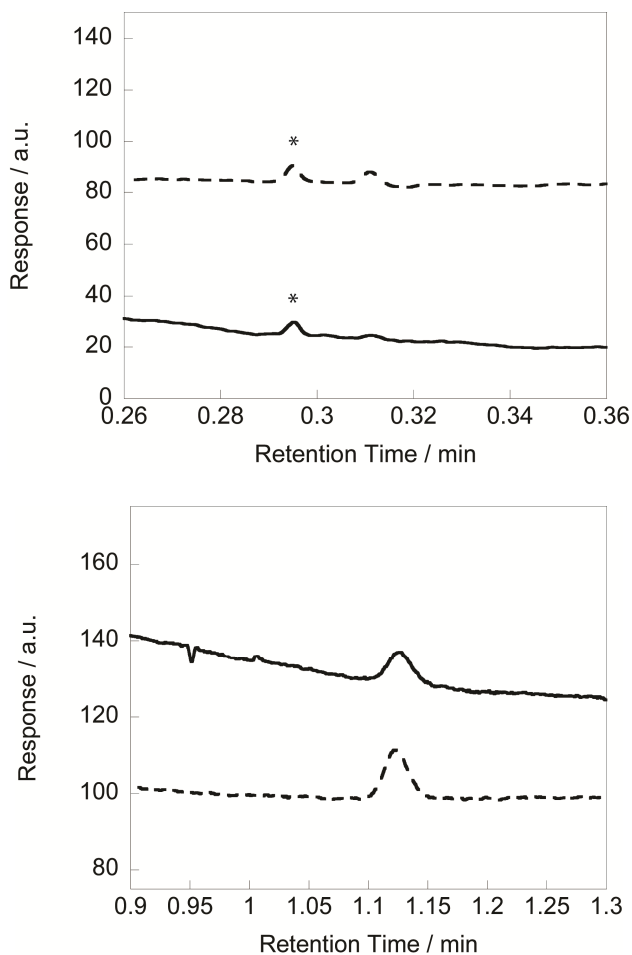

**Fig. S7** Gas chromatogram of **8** after 2 h electrolysis at -1.5 V relative to SCE (—) and addition of 10  $\mu\text{L}$   $\text{H}_2$  after 2 h electrolysis (---) in 0.3 M  $\text{NBu}_4\text{PF}_6$  in wet  $\text{CH}_3\text{CN}$ , using a glassy carbon rod electrode.  $\text{H}_2$  (top) and  $\text{CO}$  (bottom) were identified at 0.31 and 1.15 min, respectively.

*\*unknown trace component also observed in a blank sample of air*

**Table S1.** Crystallographic Data for Ni complexes **7-10**

|                                               | [Ni( <sup>Et</sup> bimpy)](PF <sub>6</sub> ) <sub>2</sub><br>( <b>7</b> )       | [Ni( <sup>Pr</sup> bimpy)](PF <sub>6</sub> ) <sub>2</sub><br>( <b>8</b> )       | [Ni <sub>2</sub> ( <sup>Me</sup> bimpy) <sub>2</sub> ](OTf) <sub>2</sub><br>( <b>9</b> )                     | [Ni <sub>2</sub> ( <sup>Et</sup> bimpy) <sub>2</sub> ](PF <sub>6</sub> ) <sub>2</sub> ·2DME<br>( <b>10</b> )  |
|-----------------------------------------------|---------------------------------------------------------------------------------|---------------------------------------------------------------------------------|--------------------------------------------------------------------------------------------------------------|---------------------------------------------------------------------------------------------------------------|
| <b>Empirical Formula</b>                      | C <sub>18</sub> H <sub>16</sub> N <sub>6</sub> NiP <sub>2</sub> F <sub>12</sub> | C <sub>19</sub> H <sub>18</sub> N <sub>6</sub> NiP <sub>2</sub> F <sub>12</sub> | C <sub>36</sub> H <sub>28</sub> N <sub>12</sub> Ni <sub>2</sub> F <sub>6</sub> O <sub>6</sub> S <sub>2</sub> | C <sub>42</sub> H <sub>48</sub> N <sub>12</sub> Ni <sub>2</sub> P <sub>2</sub> F <sub>12</sub> O <sub>4</sub> |
| <b>Formula Weight</b>                         | 665.02                                                                          | 679.04                                                                          | 1020.24                                                                                                      | 1192.28                                                                                                       |
| <b>Crystal System</b>                         | Monoclinic                                                                      | Trigonal                                                                        | Monoclinic                                                                                                   | Monoclinic                                                                                                    |
| <b>Space Group</b>                            | C2/c                                                                            | R-3                                                                             | P2(1)/c                                                                                                      | P2(1)/n                                                                                                       |
| <b><i>a</i></b>                               | 10.0790(7)                                                                      | 33.730(4)                                                                       | 7.404(17)                                                                                                    | 10.6550(15)                                                                                                   |
| <b><i>b</i></b>                               | 19.0802(15)                                                                     | 33.730(4)                                                                       | 31.424(7)                                                                                                    | 21.779(3)                                                                                                     |
| <b><i>c</i></b>                               | 12.1281(9)                                                                      | 13.4121(18)                                                                     | 16.616(4)                                                                                                    | 21.880(3)                                                                                                     |
| <b>α (°)</b>                                  | 90                                                                              | 90                                                                              | 90                                                                                                           | 90                                                                                                            |
| <b>β (°)</b>                                  | 100.4060(10)                                                                    | 90                                                                              | 98.615(4)                                                                                                    | 99.063(2)                                                                                                     |
| <b>γ (°)</b>                                  | 90                                                                              | 120                                                                             | 90                                                                                                           | 90                                                                                                            |
| <b><i>V</i>(Å<sup>3</sup>)</b>                | 2294.0(3)                                                                       | 12314(3)                                                                        | 3822.2(15)                                                                                                   | 5014.0(12)                                                                                                    |
| <b><i>Z</i></b>                               | 4                                                                               | 18                                                                              | 8                                                                                                            | 8                                                                                                             |
| <b>ρ<sub>calc</sub> (g/cm<sup>3</sup>)</b>    | 1.926                                                                           | 1.536                                                                           | 1.773                                                                                                        | 3.159                                                                                                         |
| <b>μ (mm<sup>-1</sup>)</b>                    | 1.106                                                                           | 0.866                                                                           | 1.190                                                                                                        | 1.828                                                                                                         |
| <b>2θ<sub>max</sub> (°)</b>                   | 50.66                                                                           | 50.74                                                                           | 50.70                                                                                                        | 50.9                                                                                                          |
| <b>Reflections</b>                            |                                                                                 |                                                                                 |                                                                                                              |                                                                                                               |
| <b>Collected</b>                              | 12525                                                                           | 94483                                                                           | 32458                                                                                                        | 51586                                                                                                         |
| <b>Independent</b>                            |                                                                                 |                                                                                 |                                                                                                              |                                                                                                               |
| <b>Reflections</b>                            | 2099                                                                            | 5384                                                                            | 6961                                                                                                         | 9220                                                                                                          |
| <b>Refl/Param</b>                             | 11.45                                                                           | 14.91                                                                           | 12.06                                                                                                        | 13.94                                                                                                         |
| <b><i>R1</i>, w<i>R2</i> (<i>I</i>&gt;2σ)</b> | 0.0217, 0.0564                                                                  | 0.0406, 0.1052                                                                  | 0.0518, 0.1058                                                                                               | 0.0406, 0.0825                                                                                                |
| <b><i>R1</i>, w<i>R2</i> (all data)</b>       | 0.0220, 0.0566                                                                  | 0.0485, 0.1099                                                                  | 0.0939, 0.1254                                                                                               | 0.0837, 0.1003                                                                                                |
| <b>Ni-Ni (Å)</b>                              |                                                                                 |                                                                                 | 2.5087(10)                                                                                                   | 2.5790 (6)                                                                                                    |

## References

1. Masotti, H.; Wallet, J. C.; Peiffer, G.; Petit, F.; Mortreux, A.; Buono, G. *J. Organomet. Chem.* **1986**, *308*, 241-252.
2. Kermagoret, A.; Braunstein, P. *Organometallics* **2008**, *27*, 88-99.
3. Zhu, L.; Guo, P.; Li, G.; Lan, J.; Xie, R.; You, J. *J. Org. Chem.* **2007**, *72*, 8535-8538.
4. N. G. Connelly and W. E. Geiger, *Chem. Rev.*, 1996, **96**, 877-910.
5. G. M. Sheldrick, *SHELXTL*, Bruker AXS Inc.: Madison, WI (USA), 2005.
6. (a) G. M. Sheldrick, *Acta Crystallogr., Sect. A: Found. Crystallogr.*, 1990, **46**, 467-473; (b) G. M. Sheldrick, *Acta Crystallogr., Sect. A: Found. Crystallogr.*, 2008, **64**, 112-122; (c) G. M. Sheldrick, *SHELXL-97: Program for crystal structure determination*, University of Göttingen: Göttingen, Germany, 1997.
